# Supplementary material for: Young adults’ attitudes to sharing whole-genome sequencing information: a university-based survey
Source: PubMed Central journal article supplement (PMC6469029; doi:10.1186/s12920-019-0499-2), 2019-04-16
Supplement: 12920_2019_499_MOESM1_ESM.pdf [file 12920_2019_499_MOESM1_ESM.pdf]

## Whole Genome Sequencing Study: My Genomic Life Survey

Welcome to this survey designed to explore your views about receiving and sharing information from **Whole Genome Sequencing (WGS), the process of sequencing a person's entire DNA**. Analyses are performed on the sequence to provide results on various health conditions. You may fill in this survey electronically by using “text comment” or “draw free form” functions found in the “Comment” menu, (see the top right of this PDF's toolbar) and return completed survey with your consent form and prize draw coupon by e-mail to [pepita.stringer@nottingham.ac.uk](mailto:pepita.stringer@nottingham.ac.uk) OR you may complete printed forms. Completed consent form, survey and prize draw coupon may be returned by post or scanned and emailed. Postal address: Pepita Stringer, Room B38, School of Computer Science, University of Nottingham, Jubilee Campus, Wollaton Road, Nottingham England NG8 1BB  
If you have any questions, please get in touch with Pepita by email.

1. How did you first become aware of WGS? Tick all boxes that apply to you.

- a. Through this study
- b. On the Internet
- c. A video on the Internet
- d. In a movie
- e. On TV
- f. A printed magazine or newspaper
- g. A book
- h. Academic journal article
- i. A friend
- j. A family member
- k. A health professional
- l. At school
- m. At university

If you answered “Yes” to any of the above, please describe an example (or more).

---

---

---

2. Since hearing or reading about WGS, have you looked for more information about it?

- Yes       No

3. If you answered “Yes” to Question 2: Where did you seek additional information?  
(please tick as many options from the following that apply to you)

- a. Web links from study’s information sheet
- b. Academic journals
- c. Books or other printed materials
- d. Other internet sources
- e. Friends
- f. Family members
- g. Work colleagues
- h. Health professionals
- i. Other, please specify \_\_\_\_\_

Please answer the following questions about the human genome. It is not expected that you have all the answers.

4. Genes come in pairs, with one copy inherited from each parent.

- I don’t know       false       true

5. The chromosomes of men and women are similar except for one pair.

- I don’t know       false       true

6. For some disorders to be inherited, a mutation must come from both parents.

- I don’t know       false       true

7. Males and females have the same number of chromosomes.

- I don’t know       false       true

8. A gene is a disease.

- I don’t know       false       true

9. Parents with no sign of ill-health can have a child with an inherited disease.

- I don’t know       false       true

10. The carrier of a disease gene may be completely healthy.

- I don't know       false       true

11. Some genetic conditions express themselves later in adult life

- I don't know       false       true

12. How many pairs of chromosomes do humans have?

- a. 23  
 b. 24  
 c. 27  
 d. 28  
 e. I don't know

13. In DNA, the Adenine nucleotide bonds with which nucleotide to form a base pair?

- a. Guanine  
 b. Cytosine  
 c. Thymine  
 d. Uracil  
 e. I don't know

14. Approximately how many protein-encoding genes do humans have?

- a. 20,000 to 25,000  
 b. 35,000 to 40,000  
 c. 70,000-75,000  
 d. More than 100,000  
 e. I don't know

For the following questions, please draw an ellipse on the scale, of any size you choose. *EXAMPLE 1*

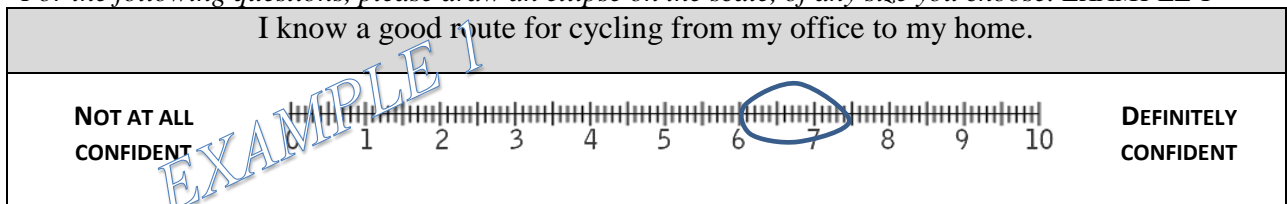

*EXAMPLE 2: To correct a mistake, make crosses at both sides of an incorrect ellipse (6 - 8), then draw a new one.*

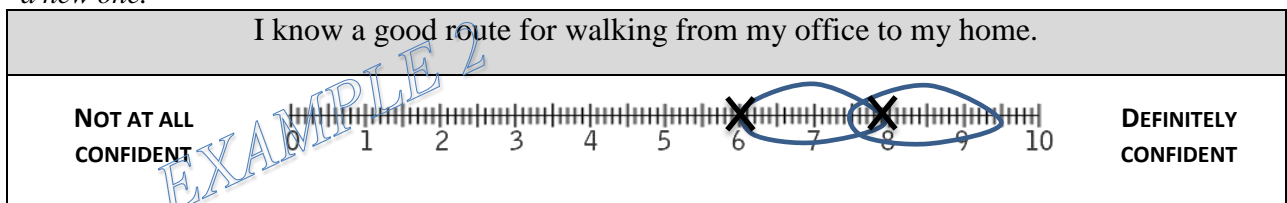

Draw your ellipses as you see fit for each of the statement below.

1. I am confident I can find information on whole genome sequencing (WGS).

|                              |                                                                                    |                           |
|------------------------------|------------------------------------------------------------------------------------|---------------------------|
| <b>STRONGLY<br/>DISAGREE</b> |  | <b>STRONGLY<br/>AGREE</b> |
|------------------------------|------------------------------------------------------------------------------------|---------------------------|

2. I am confident I would understand the relevant information about results from a WGS analysis.

|                              |                                                                                    |                           |
|------------------------------|------------------------------------------------------------------------------------|---------------------------|
| <b>STRONGLY<br/>DISAGREE</b> |  | <b>STRONGLY<br/>AGREE</b> |
|------------------------------|------------------------------------------------------------------------------------|---------------------------|

3. I think the development of WGS is a medical progress which may have positive impact

|                              |                                                                                    |                           |
|------------------------------|------------------------------------------------------------------------------------|---------------------------|
| <b>STRONGLY<br/>DISAGREE</b> |  | <b>STRONGLY<br/>AGREE</b> |
|------------------------------|------------------------------------------------------------------------------------|---------------------------|

4. I approve of using WGS for better management of diseases.

|                              |                                                                                      |                           |
|------------------------------|--------------------------------------------------------------------------------------|---------------------------|
| <b>STRONGLY<br/>DISAGREE</b> |  | <b>STRONGLY<br/>AGREE</b> |
|------------------------------|--------------------------------------------------------------------------------------|---------------------------|

5. I would inform my siblings about the results of my WGS analysis.

|                              |                                                                                      |                           |
|------------------------------|--------------------------------------------------------------------------------------|---------------------------|
| <b>STRONGLY<br/>DISAGREE</b> |  | <b>STRONGLY<br/>AGREE</b> |
|------------------------------|--------------------------------------------------------------------------------------|---------------------------|

6. I would inform my children about the results of my WGS analysis.

|                              |                                                                                      |                           |
|------------------------------|--------------------------------------------------------------------------------------|---------------------------|
| <b>STRONGLY<br/>DISAGREE</b> |  | <b>STRONGLY<br/>AGREE</b> |
|------------------------------|--------------------------------------------------------------------------------------|---------------------------|

7. I would inform my parents about the results of my WGS analysis.

|                              |                                                                                      |                           |
|------------------------------|--------------------------------------------------------------------------------------|---------------------------|
| <b>STRONGLY<br/>DISAGREE</b> |  | <b>STRONGLY<br/>AGREE</b> |
|------------------------------|--------------------------------------------------------------------------------------|---------------------------|

8. I would want to know if I had a hereditary disease.

|                              |                                                                                      |                           |
|------------------------------|--------------------------------------------------------------------------------------|---------------------------|
| <b>STRONGLY<br/>DISAGREE</b> |  | <b>STRONGLY<br/>AGREE</b> |
|------------------------------|--------------------------------------------------------------------------------------|---------------------------|

9. I think having the results of my WGS analysis would help me take more responsibility for my health.

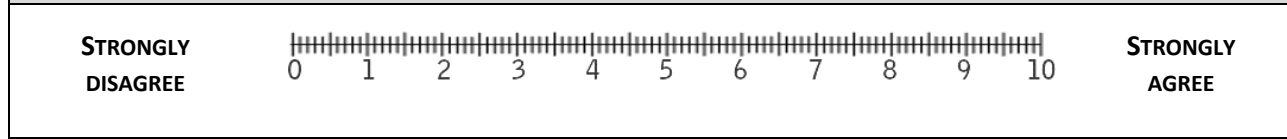

10. Knowing the results from WGS analysis could change a person's future.

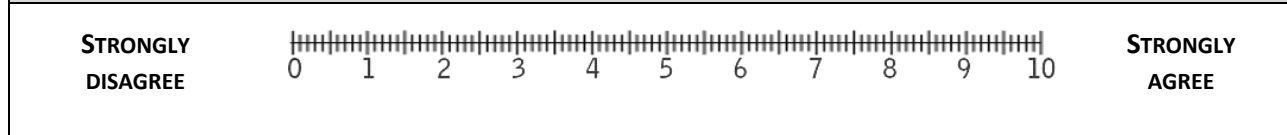

11. I am concerned about possible consequences the WGS results may have on insurance policies for health, travel or life.

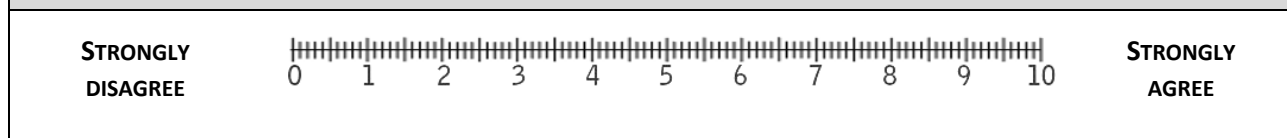

12. I only want to know about diseases that can be treated.

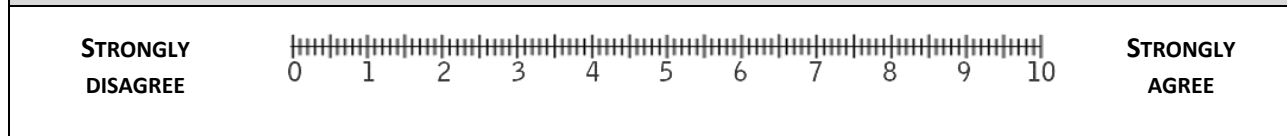

13. I would prefer not to undertake WGS.

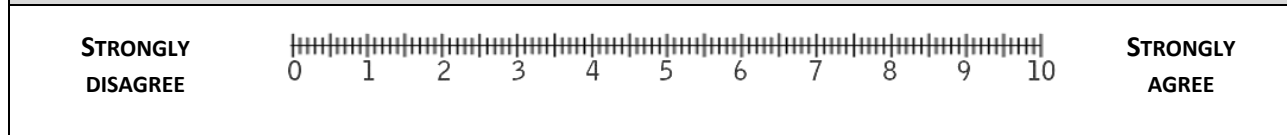

14. I want my WGS to help me learn about my ancestry and my family tree.

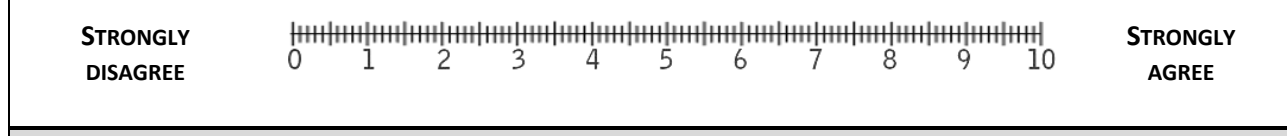

15. The idea of WGS frightens me.

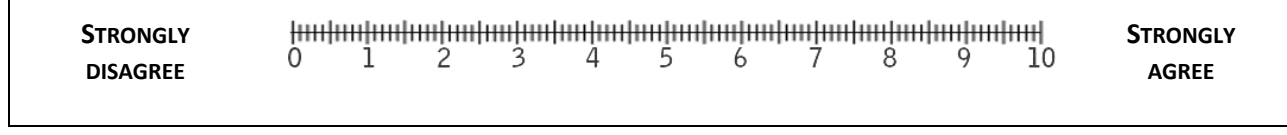

16. I would like to have my own WGS done.

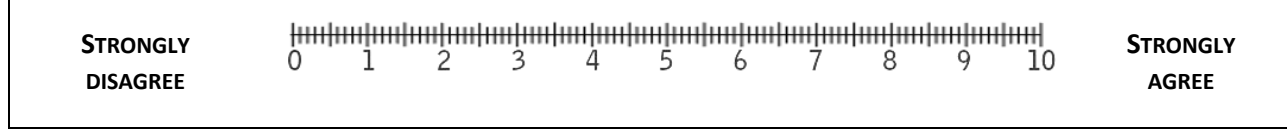

17. I would want to receive a report that explains the results from my WGS.

|                              |                                                                                    |                           |
|------------------------------|------------------------------------------------------------------------------------|---------------------------|
| <b>STRONGLY<br/>DISAGREE</b> |  | <b>STRONGLY<br/>AGREE</b> |
|------------------------------|------------------------------------------------------------------------------------|---------------------------|

18. I would want to receive the raw data from my WGS.

|                              |                                                                                    |                           |
|------------------------------|------------------------------------------------------------------------------------|---------------------------|
| <b>STRONGLY<br/>DISAGREE</b> |  | <b>STRONGLY<br/>AGREE</b> |
|------------------------------|------------------------------------------------------------------------------------|---------------------------|

19. I would consult a doctor, nurse, or counsellor before undertaking a WGS.

|                               |                                                                                    |                             |
|-------------------------------|------------------------------------------------------------------------------------|-----------------------------|
| <b>EXTREMELY<br/>UNLIKELY</b> |  | <b>EXTREMELY<br/>LIKELY</b> |
|-------------------------------|------------------------------------------------------------------------------------|-----------------------------|

20. I like the idea of purchasing WGS services over the Internet.

|                              |                                                                                      |                           |
|------------------------------|--------------------------------------------------------------------------------------|---------------------------|
| <b>STRONGLY<br/>DISAGREE</b> |  | <b>STRONGLY<br/>AGREE</b> |
|------------------------------|--------------------------------------------------------------------------------------|---------------------------|

21. My relatives would want to know about my WGS results.

|                              |                                                                                      |                           |
|------------------------------|--------------------------------------------------------------------------------------|---------------------------|
| <b>STRONGLY<br/>DISAGREE</b> |  | <b>STRONGLY<br/>AGREE</b> |
|------------------------------|--------------------------------------------------------------------------------------|---------------------------|

22. I would want to know the WGS results of my relatives.

|                              |                                                                                      |                           |
|------------------------------|--------------------------------------------------------------------------------------|---------------------------|
| <b>STRONGLY<br/>DISAGREE</b> |  | <b>STRONGLY<br/>AGREE</b> |
|------------------------------|--------------------------------------------------------------------------------------|---------------------------|

23. I would consider knowing my WGS analysis as:

|                |                                                                                      |                   |
|----------------|--------------------------------------------------------------------------------------|-------------------|
| <b>HARMFUL</b> |  | <b>BENEFICIAL</b> |
|----------------|--------------------------------------------------------------------------------------|-------------------|

24. I would consider knowing my WGS analysis as:

|                  |                                                                                      |                 |
|------------------|--------------------------------------------------------------------------------------|-----------------|
| <b>WORTHLESS</b> |  | <b>VALUABLE</b> |
|------------------|--------------------------------------------------------------------------------------|-----------------|

25. I consider myself...

VERY UNHEALTHY      0      1      2      3      4      5      6      7      8      9      10      VERY HEALTHY

Please fill in the blanks and make a tick in the circles  that apply to you:

26. Please state your age: I am \_\_\_\_\_ years old

27. Please state your gender: I am \_\_\_\_\_

28. Have you studied genetics as part of a biology course?

- no                       yes (at school)                       yes (at university)

29. Have you been on a course specifically about genetics?

- no                       yes (at school)                       yes (at university)

30. What is your highest completed level of education? \_\_\_\_\_

31. Are you employed?

- no                       yes, part-time                       yes, full-time

If you are employed, what is your current role(s)? \_\_\_\_\_

32. Are you a student?

- no                       yes, part-time                       yes, full-time

If you are a student, what is your field of study? \_\_\_\_\_

33. Do you teach or do research?

- no                       yes

If you teach or do research, what is your field?

\_\_\_\_\_

34. What country have you mainly resided in for the last 6 months?

\_\_\_\_\_

35. Would you want your genomic data to be available to wider health research studies?

- no     yes, but only if I'm not re-identifiable     yes, if I can be re-identified and contacted  
 other response, please describe \_\_\_\_\_

36. Would you like to learn more about WGS or the human genome?

- no                       yes

Please make comments \_\_\_\_\_

\_\_\_\_\_

\_\_\_\_\_

\_\_\_\_\_

**This survey used the following method to gather your opinions, see the example below:**

Please draw an ellipse on the scale to reflect your views.

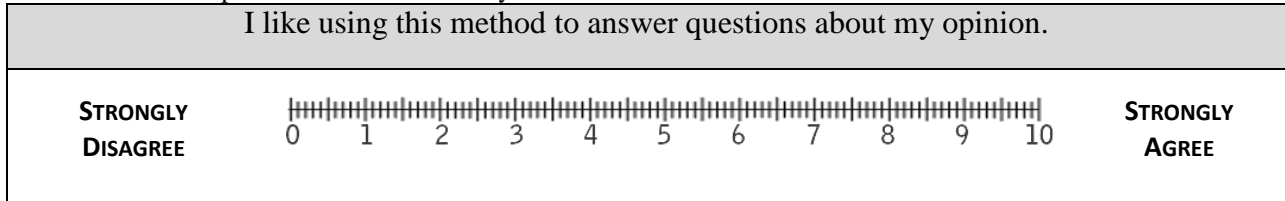

36. Please describe how the method used in this survey affected your ability to express your opinions.

---



---

**Many surveys use the following format for gathering opinions:**

Please click the dot to select your response from those below:

I like using this method to answer questions about my opinion.

|                       |                       |                       |                       |                       |                       |                       |
|-----------------------|-----------------------|-----------------------|-----------------------|-----------------------|-----------------------|-----------------------|
| <input type="radio"/> | <input type="radio"/> | <input type="radio"/> | <input type="radio"/> | <input type="radio"/> | <input type="radio"/> | <input type="radio"/> |
| Strongly<br>Disagree  | Disagree              | Slightly<br>Disagree  | Neither               | Slightly<br>Agree     | Agree                 | Strongly<br>Agree     |

37. Would you have been able to express yourself better using this method?

---



---

38. Please select words below that reflect your opinion of the method used in this survey (select all that apply).

- |                                 |                                      |                                      |
|---------------------------------|--------------------------------------|--------------------------------------|
| <input type="radio"/> Realistic | <input type="radio"/> Confusing      | <input type="radio"/> Intuitive      |
| <input type="radio"/> Easy      | <input type="radio"/> Time-efficient | <input type="radio"/> Correct        |
| <input type="radio"/> Natural   | <input type="radio"/> Vague          | <input type="radio"/> Cryptic        |
| <input type="radio"/> Clear     | <input type="radio"/> Difficult      | <input type="radio"/> Time-consuming |

Please write three words below to describe your thoughts about using the method above to answer the questions in this survey.

- ---
- ---
- ---

**Completed consent form and survey** to be returned by email to [pepita.stringer@nottingham.ac.uk](mailto:pepita.stringer@nottingham.ac.uk), by post to Pepita Stringer, School of Computer Science, University of Nottingham, Wollaton Road, Nottingham England NG8 1BB, in person or as directed. **Thank you for your participation, it is very much appreciated!**
